# Supplementary material for: Factors Associated with Tobacco Smoking and Cessation among HIV-Infected Individuals under Care in Rio de Janeiro, Brazil
Source: PubMed Central journal article supplement (PMC4275249; doi:10.1371/journal.pone.0115900), 2014-12-23
Supplement: pone.0115900.s001.pdf [file pone.0115900.s001.pdf]

**Table S1: Characteristics of cohort individuals who were included vs. not included in the cross-sectional tobacco study.**

|                                                        | <b>Not –included</b> | <b>Included</b> | <b>p-value*</b> |
|--------------------------------------------------------|----------------------|-----------------|-----------------|
|                                                        | <b>N=1607</b>        | <b>N=2775</b>   |                 |
| First appointment after January 1 <sup>st</sup> , 1997 | 1222(76.0)           | 2516(90.7)      | <0.001          |
| Follow-up time higher than 60days                      | 1318(82.0)           | 2717(97.9)      | <0.001          |
| Male                                                   | 1115(69.3)           | 1812(65.3)      | 0.006           |
| Age                                                    | 34.7(10.7)           | 36.1(10.0)      | <0.001          |
| White                                                  | 787(49.0)            | 1475(53.2)      | <0.001          |
| HIV exposure category                                  |                      |                 | <0.001          |
| Heterosexuals                                          | 637(39.6)            | 1389(50.1)      |                 |
| MSM                                                    | 444(27.6)            | 753(27.1)       |                 |
| IDU                                                    | 25(1.6)              | 43(1.6)         |                 |
| Other/unknown                                          | 502(31.2)            | 589(21.2)       |                 |
| cART use                                               | 958(59.6)            | 2599(93.7)      | <0.001          |
